# Supplementary material for: Predictors of Lesion Cavitation After Recent Small Subcortical Stroke
Source: PubMed Central journal article supplement (PMC7235062; doi:10.1007/s12975-019-00741-8), 2019-11-08
Supplement: 12975_2019_741_MOESM1_ESM.pdf [file 12975_2019_741_MOESM1_ESM.pdf]

**Predictors of lesion cavitation after recent small subcortical stroke**

**Running title: Predictors of lacunar cavitation**

Thomas Gatttringer (MD, PhD)<sup>1,2</sup>, Maria Valdes Hernandez (PhD)<sup>2</sup>, Anna Heye (PhD)<sup>2</sup>, Paul A Armitage (PhD)<sup>3</sup>, Stephen Makin (MD)<sup>2,4</sup>, Francesca Chappell (MSc)<sup>2</sup>, Daniela Pinter (PhD)<sup>1</sup>, Fergus Doubal (MD)<sup>2</sup>, Christian Enzinger (MD)<sup>1</sup>, Franz Fazekas (MD)<sup>1</sup> and Joanna M Wardlaw (MD)<sup>2</sup>

1 Department of Neurology, Medical University of Graz, Austria

2 Centre for Clinical Brain Sciences, and UK Dementia Research Institute at the University of Edinburgh, Edinburgh, UK

3 Department of Infection, Immunity and Cardiovascular Disease, University of Sheffield, UK

4 Academic Section of Geriatric Medicine, Institute of Cardiovascular and Medical Sciences, University of Glasgow, Glasgow, UK

Corresponding author: Professor Joanna M Wardlaw

Centre for Clinical Brain Sciences

Chancellor's Building, 49 Little France Crescent

Edinburgh EH16 4SB, UK.

Telephone: +44 (0) 131 537 2943, Email: [joanna.wardlaw@ed.ac.uk](mailto:joanna.wardlaw@ed.ac.uk)

## Translational Stroke Research 2019: Supplementary Material

### Inter-observer reliability of the T1-weighted cavity at one year follow-up

To recreate a practical scenario, two observers with different levels of experience delineated the boundaries of the recent small subcortical infarct (RSSI) on the same structural imaging modalities (i.e. T1-weighted MRI sequences) but pre-processed differently as **Table 1** shows. Observer 1, an experienced neurologist, used the software Mango (<http://ric.uthscsa.edu/mango/>) to generate the reference binary masks, while Observer 2 used the Region of Interest Tool in Analyze 12.0 (<https://analyzedirect.com/analyze-12-0/>). To evaluate the validity of the results obtained and limits of agreement, inter-observer reliability was assessed using Bland Altman plots [1].

Table 1. Image processing details of the ROIs used in the inter-observer agreement analyses

|                                                                           | ROIs generated by <b>Observer 1</b><br>(stroke neurologist)         | ROIs generated by <b>Observer 2</b><br>(image analyst)                                                                                                         |
|---------------------------------------------------------------------------|---------------------------------------------------------------------|----------------------------------------------------------------------------------------------------------------------------------------------------------------|
| MRI sequence(s) used in the delineation of the cavity at 1-year follow-up | Original T1-weighted guided by DWI, FLAIR and T2-weighted           | Original T1-weighted, guided by DWI and neuro-radiological reports                                                                                             |
| Method for delineating the ROIs                                           | Manual boundary delineation                                         | Semi-automatic by thresholding combined with a region-growing algorithm                                                                                        |
| Software used for delineating the ROIs                                    | Mango                                                               | Analyze 12.0                                                                                                                                                   |
| Criteria followed for delineating the ROIs                                | DWI appearance, FLAIR and T1 signal and neuroradiological knowledge | DWI appearance, FLAIR/T1W signal, connected-component analyses, symmetry with the contralateral hemisphere, neuroradiological assessment notes, and T2 signal. |

### Results of the inter-observer agreement analyses

The volumetric difference of the cavity volume at 1 year was 2% between observers 1 and 2 albeit differences in the software, image space and methods used.

Table 2. Results of the inter-observer agreement analysis. Observer 1 measurements were considered as reference.

| Parameters                     | Mean difference [95%CI]              | % mean difference in average measure (SD) |
|--------------------------------|--------------------------------------|-------------------------------------------|
| 1-year follow-up cavity volume | -2.25 [-39.85 35.35] mm <sup>3</sup> | -2.40 (20.09) %                           |

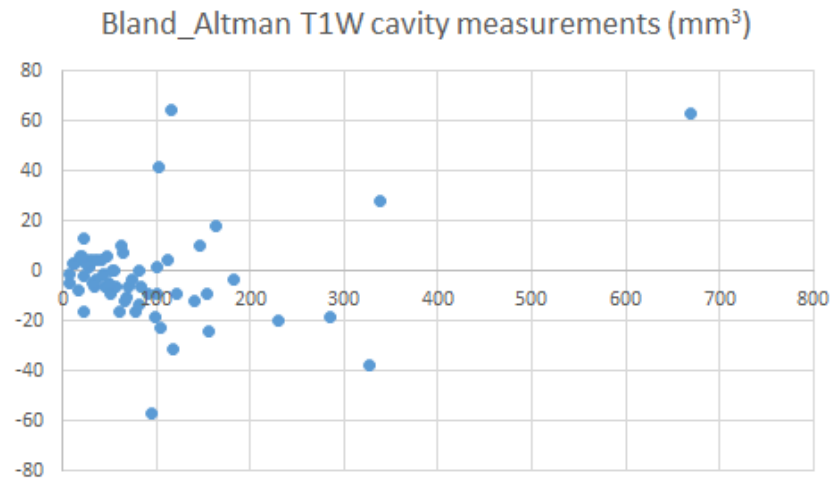

Figure 1. Bland-Altman analyses of the inter-observer volumetric differences in the delineation of the T1 cavitation at follow-up. Volumes (i.e. in both axes) are in mm<sup>3</sup>.

#### References

- [1] Bland JM, Altman DG. Statistical methods for assessing agreement between two methods of clinical measurement. *Lancet*. 1986 Feb 8;1(8476):307-10.
